# Supplementary material for: Modulation of cGAS-STING signaling by PPARα in a mouse model of ischemia-induced retinopathy
Source: PubMed Central journal article supplement (PMC9860285; doi:10.1073/pnas.2208934119), 2022-11-21
Supplement: pnas.2208934119.sapp.pdf [file pnas.2208934119.sapp.pdf]

## Supporting Information for

Modulation of cGAS-STING Signaling by PPAR $\alpha$  in a Mouse Model of Ischemia-Induced Retinopathy

Xiang Ma<sup>1,2</sup>, Wenjing Wu<sup>1,2</sup>, Wentao Liang<sup>1,2</sup>, Yusuke Takahashi<sup>1,2</sup>, Jiyang Cai<sup>1\*</sup>, Jian-xing Ma<sup>1,2\*</sup>

<sup>1</sup>Department of Physiology, University of Oklahoma Health Sciences Center, Oklahoma City, OK, USA.

<sup>2</sup>Department of Biochemistry, Wake Forest University School of Medicine, Winston-Salem, NC, USA.

### \*Correspondence to

Jiyang Cai, University of Oklahoma Health Sciences Center, BMSB 662, 940 Stanton L. Young Blvd, Oklahoma City, OK 73104

Tel: 405-271-2226; E-mail: [Jiyang-cai@ouhsc.edu](mailto:Jiyang-cai@ouhsc.edu)

Jian-Xing Ma, Department of Biochemistry, Wake Forest University School of Medicine, Winston-Salem, NC, 27157

Tel: +1 336-716-4676; E-mail: [jianma@wakehealth.edu](mailto:jianma@wakehealth.edu)

### This PDF file includes:

Figures S1 to S5

Tables S1 to S2

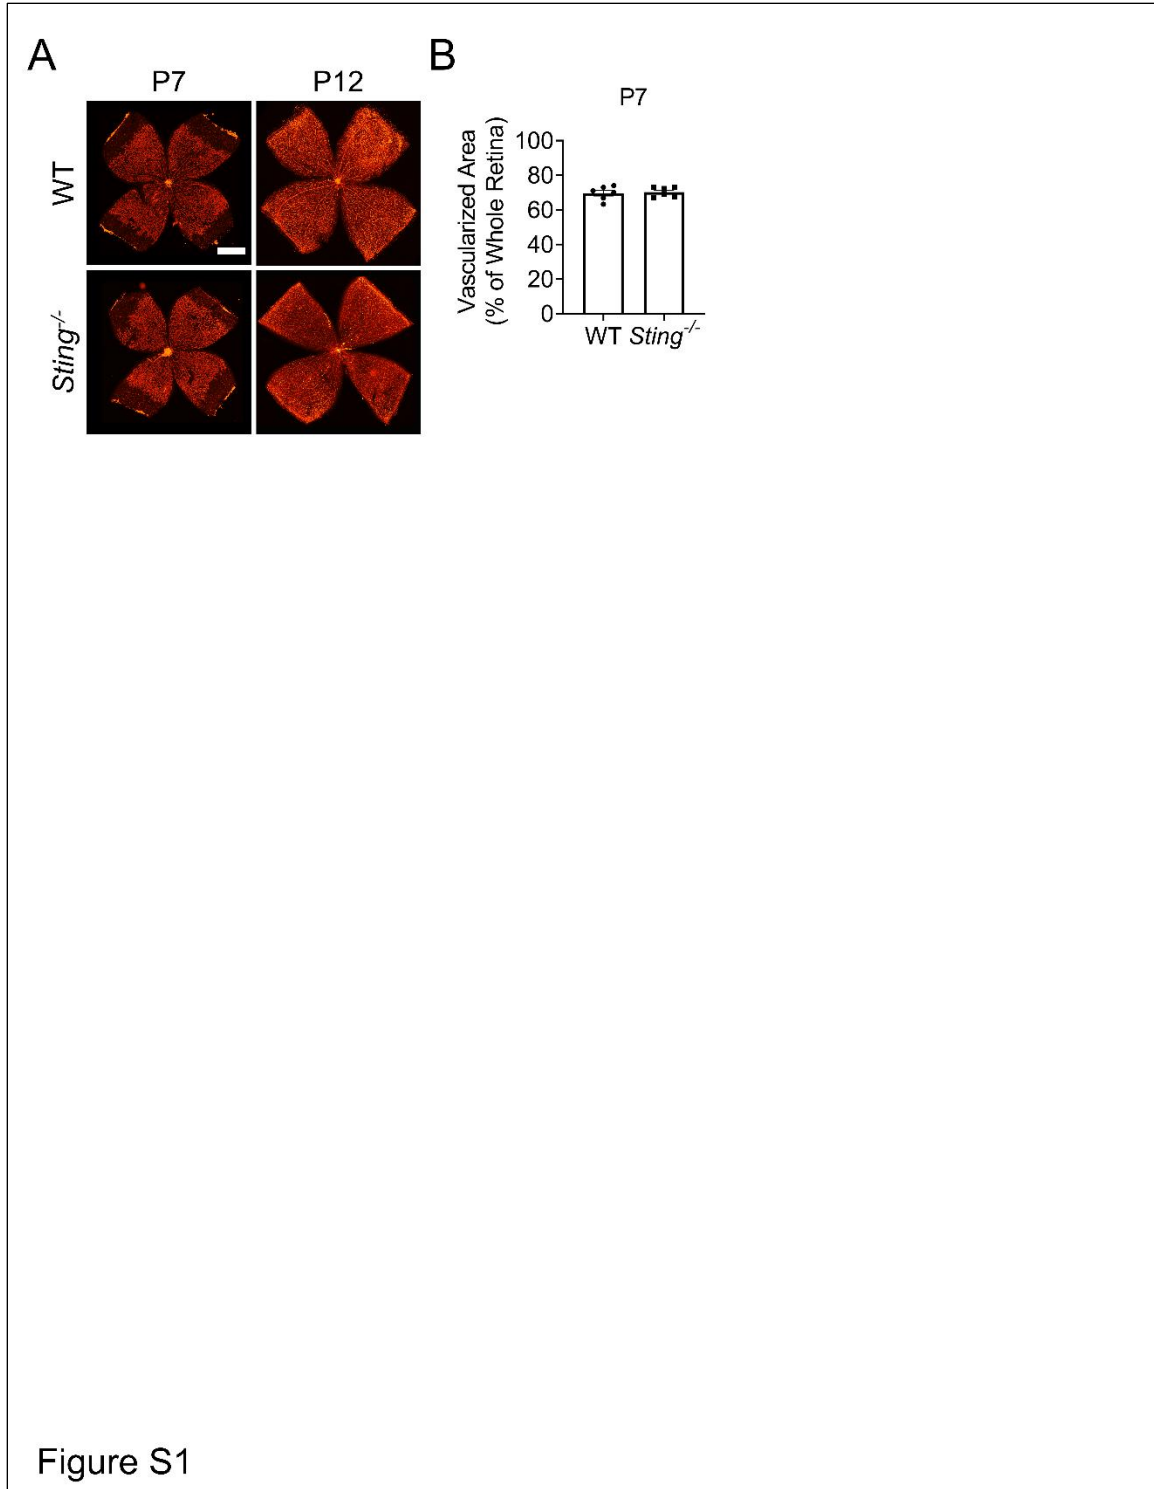

29

30 **Figure S1. *Sting*<sup>-/-</sup> mice had normal retinal vascular development.** A: Representative images  
 31 of isolectin-stained retinal flatmounts from WT and *Sting*<sup>-/-</sup> mice in RA at P7 and P12. Retinal  
 32 vasculature was expanding toward periphery at P7 and covered whole retinal areas at P12 in both  
 33 genotypes. Scale bar: 1 mm. B: The percentage of vascularized areas in whole retinas at P7 in (A)  
 34 were measured (n = 6). Data were presented as mean ± SEM.

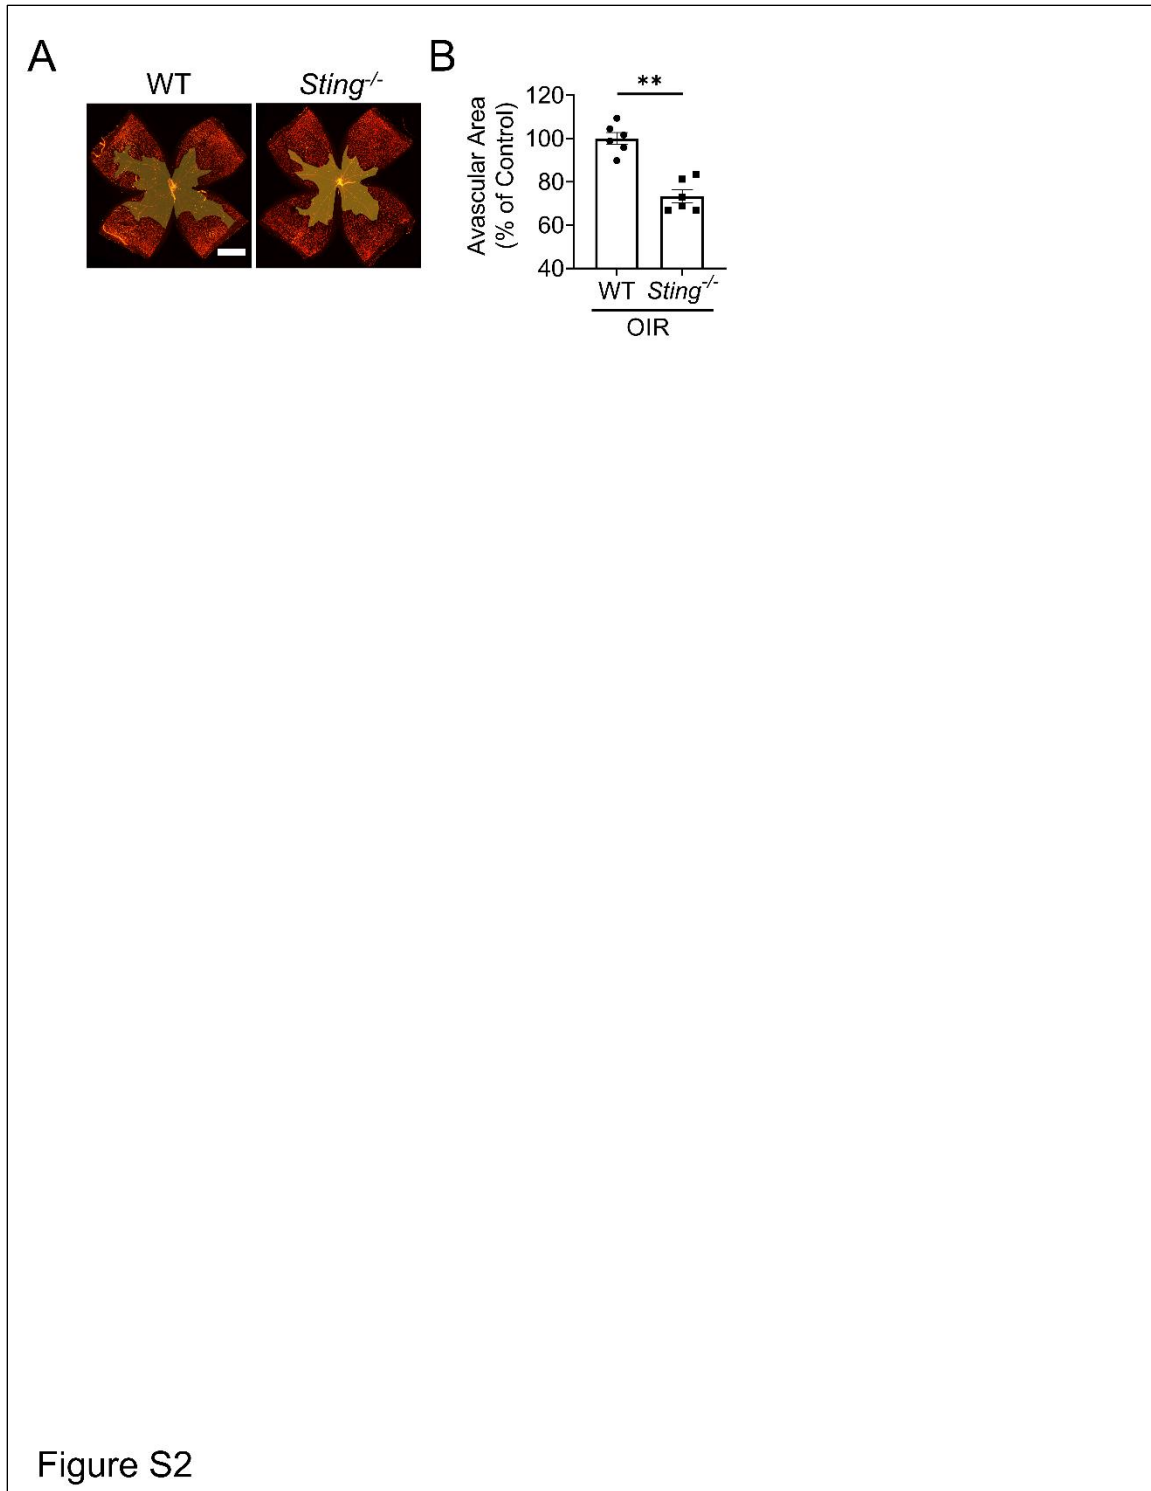

35

36 **Figure S2. Knockout of *Sting* suppressed the vaso-obliteration at the hyperoxia stage of the**  
 37 **OIR model.** A: Representative images of isolectin-stained retinal flatmounts from WT and *Sting*<sup>-/-</sup>  
 38 mice immediately after hyperoxic stage in the OIR model at P12. Scale bar: 1 mm. Avascular areas  
 39 were labeled with yellow color. B: Avascular areas in (A) were quantified (n = 6). Data were  
 40 presented as mean ± SEM. \*\* P < 0.01.

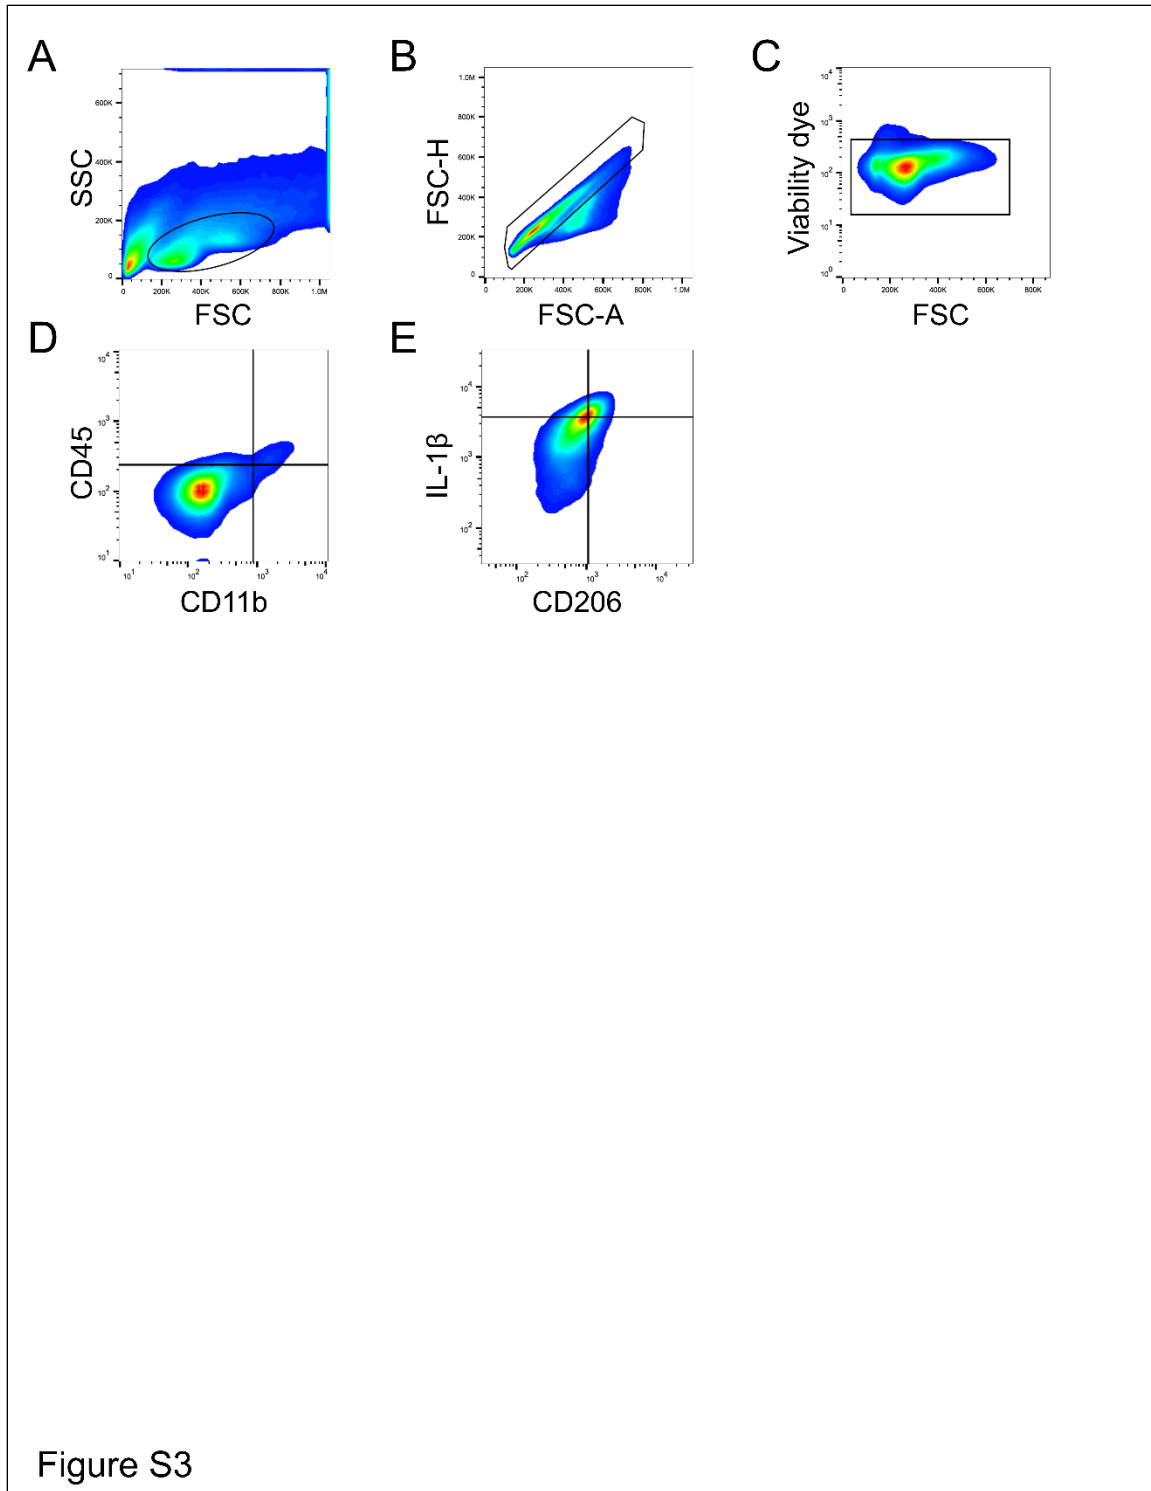

41

42 **Figure S3. Gating strategy for flow cytometry analysis.** A: Retinal cell suspensions were  
 43 analyzed by flow cytometry. B: Singlets were selected, and multipllets were excluded. C: Dead cells  
 44 were excluded using fixable viability dye. D: Retinal myeloid cells were defined as CD45<sup>+</sup>CD11b<sup>+</sup>  
 45 cells. E: The IL1 $\beta$ <sup>+</sup> and CD206<sup>+</sup> fractions were measured in retinal myeloid cells.

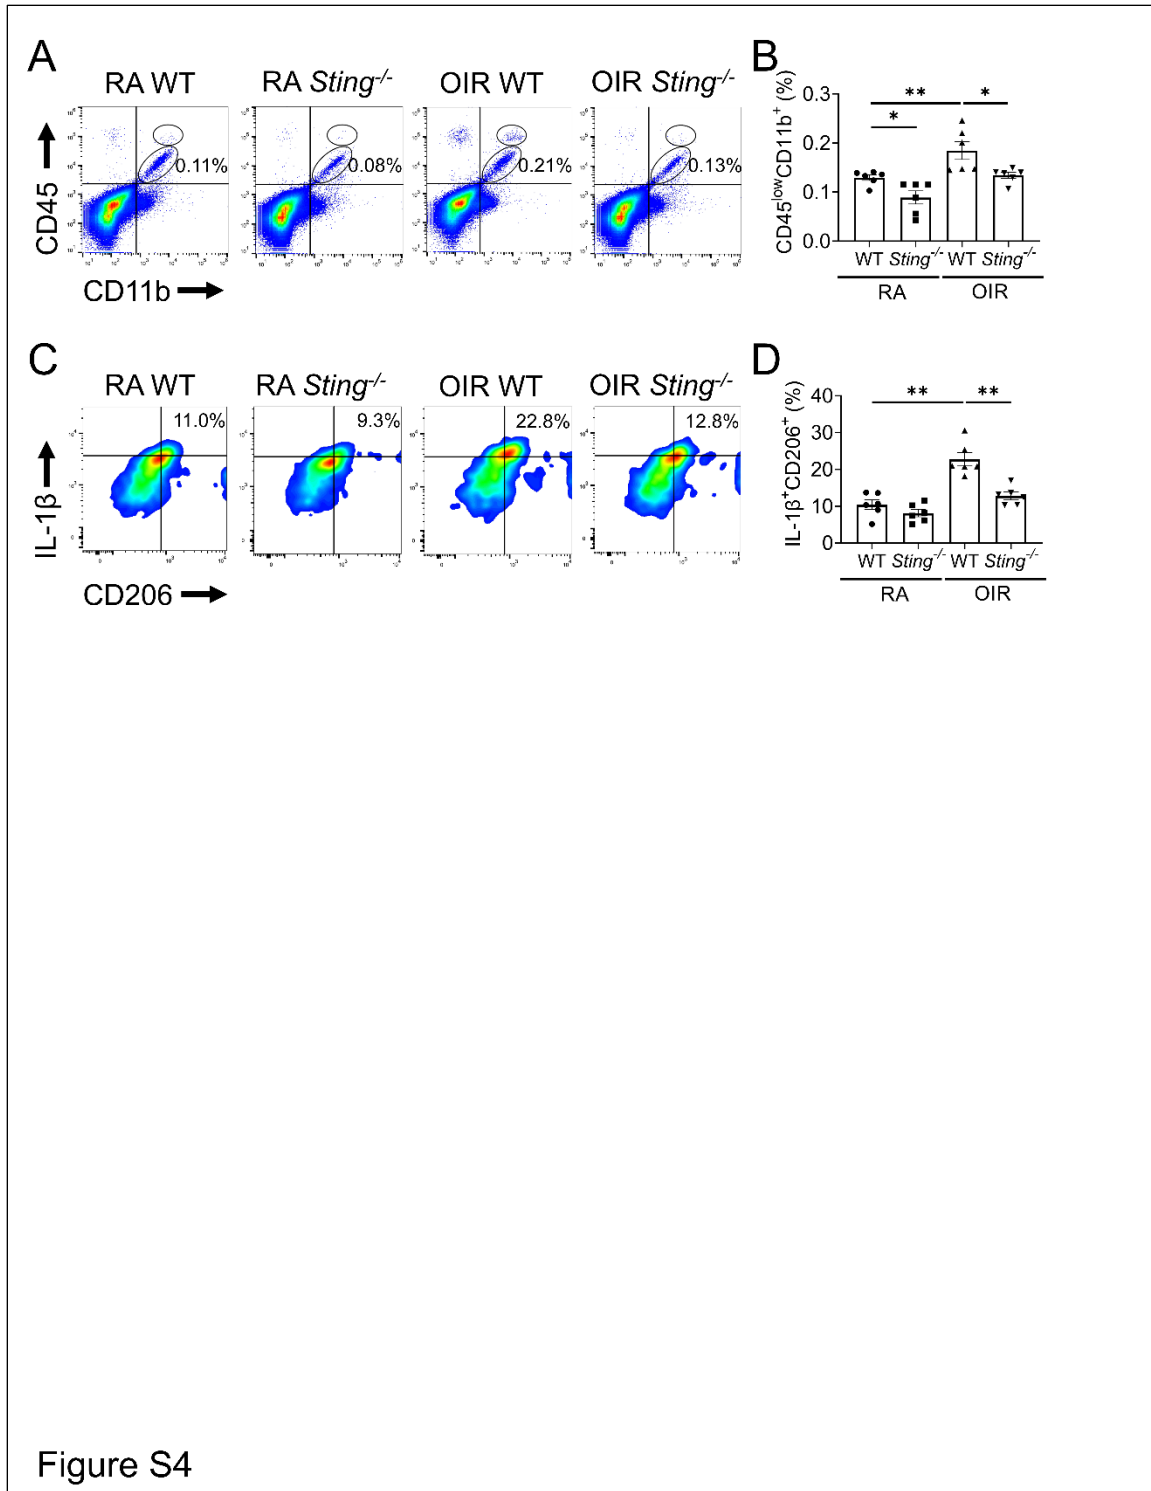

46

47 **Figure S4. Knockout of *Sting* attenuated the overactivation of retinal microglia cells in the**  
 48 **OIR model.** A: Representative flow cytometric plots of retinal microglia cells (CD45<sup>low</sup>CD11b<sup>+</sup>) in  
 49 the retinas of WT and *Sting*<sup>-/-</sup> mice in RA control and OIR groups at P17. The lower and upper  
 50 ellipse-shaped gates indicated CD45<sup>low</sup>CD11b<sup>+</sup> and CD45<sup>high</sup>CD11b<sup>+</sup> cells, respectively. B: Flow  
 51 cytometric quantification of retinal microglia percentage in retinal cells in (A) (n = 6). C:

52 Representative flow cytometric plots of IL-1 $\beta$ +CD206<sup>+</sup> in CD45<sup>low</sup>CD11b<sup>+</sup> cells in the retinas of RA  
53 controls and OIR mice at P17. D: Flow cytometric quantification of IL-1 $\beta$ +CD206<sup>+</sup> fractions in retinal  
54 CD45<sup>+</sup>CD11b<sup>+</sup> cells in (C) (n = 6). Data were presented as mean  $\pm$  SEM. \* P < 0.05, \*\* P < 0.01.

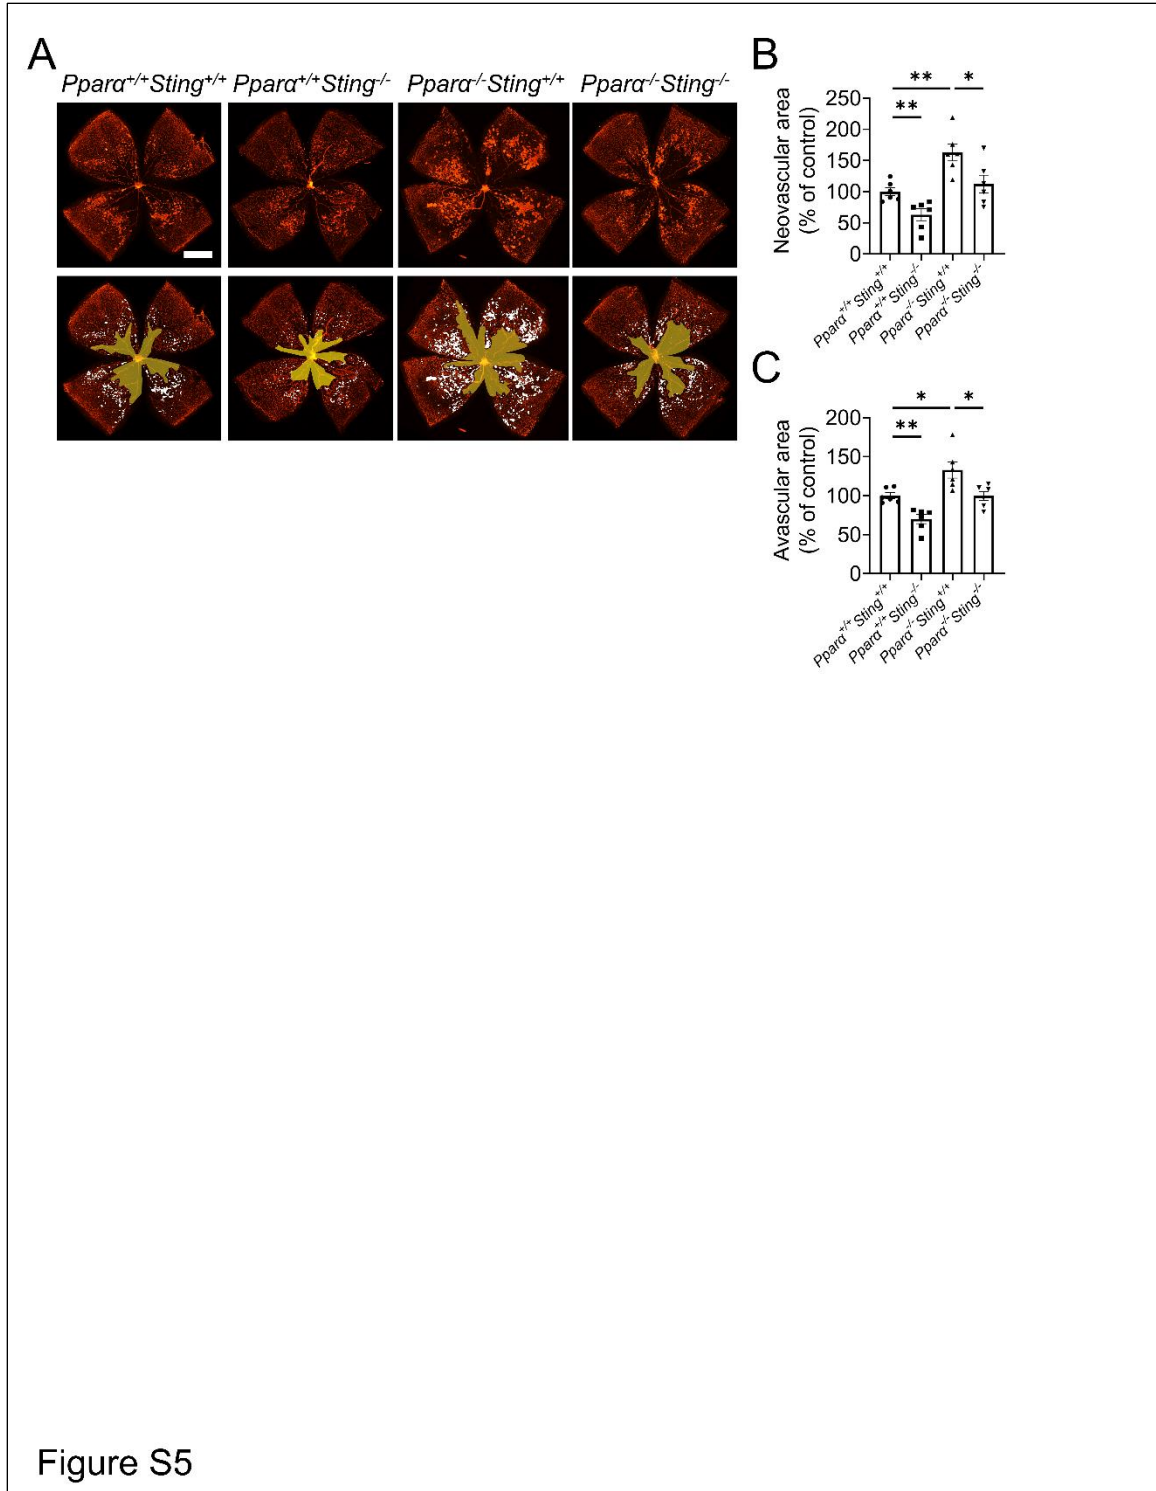

55

56 **Figure S5. Effect of *Sting* knockout and *Ppara* knockout on retinal pathological**

57 **angiogenesis in the OIR model. A:** Representative images of isolectin-stained retinal flatmounts

58 from WT, *Sting*<sup>-/-</sup>, *Ppara*<sup>-/-</sup>, and *Ppara*<sup>-/-</sup>*Sting*<sup>-/-</sup> mice with OIR at P17. Scale bar: 1 mm. The

59 neovascular areas and avascular areas were labeled with white color and yellow color, respectively.

60 B&C: The quantification of neovascular areas and avascular areas in (A) (n = 6). Data were  
61 presented as mean  $\pm$  SEM. \* P < 0.05, \*\* P < 0.01.



62 **Table S1. The list of primers used in this study.**

|                     |                                 |
|---------------------|---------------------------------|
| mt-Co1 forward      | 5'...TCGGAGCCCCAGATATAGCA...3'  |
| mt-Co1 reverse      | 5'...TTTCCGGCTAGAGGTGGGTA...3'  |
|                     |                                 |
| Actb forward        | 5'...ACCTTCTACAATGAGCTGCG...3'  |
| Actb reverse        | 5'...CTGGATGGCTACGTACATGG...3'  |
|                     |                                 |
| Mb21d1 forward      | 5'...ACGGGAGTCGGAGTTCAAAG...3'  |
| Mb21d1 reverse      | 5'...ATGACTCAGCGGATTTCTCG...3'  |
|                     |                                 |
| Tmem173 forward     | 5'...GGCTGGCCTGGTCATACTAC...3'  |
| Tmem173 reverse     | 5'...GTACAGTCTTCGGCTCCCTG...3'  |
|                     |                                 |
| Il1 $\beta$ forward | 5'...TGCCACCTTTTGACAGTGATG...3' |
| Il1 $\beta$ reverse | 5'...ATGTGCTGCTGCGAGATTTG...3'  |
|                     |                                 |
| Tnfa forward        | 5'...GACAAGCCTGTAGCCCACG...3'   |
| Tnfa reverse        | 5'...CCTTGAAGAGAACCTGGGAGT...3' |
|                     |                                 |
| Vegf forward        | 5'...CTGGACCCTGGCTTTACTGC...3'  |
| Vegf reverse        | 5'...CTGCTCTCCTTCTGTCGTGG...3'  |
|                     |                                 |
| Ccl2 forward        | 5'...CTGCTGTTACAGTTGCCG...3'    |
| Ccl2 reverse        | 5'...GCACAGACCTCTCTTTGAGC...3'  |
|                     |                                 |
| Emr1 forward        | 5'...CCCTGGGACAAACACTTGGT...3'  |
| Emr1 reverse        | 5'...TTGACATTCCACTCCTGGGC...3'  |
|                     |                                 |
| lfnb1 forward       | 5'...TGGGAGATGTCCTCAACTGC...3'  |
| lfnb1 reverse       | 5'...CCTGCAACCACCACTCATTC...3'  |

63

64 **Table S2. The list of antibodies used in this study.**

| Antibodies                     | Host   | Dilution | Company             | Catalog No. |
|--------------------------------|--------|----------|---------------------|-------------|
| cGAS                           | Rabbit | 1:1000   | Cell signaling      | 31659       |
| STING                          | Rabbit | 1:1000   | Proteintech         | 19851-1-AP  |
| CD11b                          | Rat    | 1:100    | ThermoFisher        | 14-0112-82  |
| CD31                           | Goat   | 1:200    | R&D Systems         | AF3628      |
| VEGF                           | Mouse  | 1:500    | Santa Cruz          | sc-7269     |
| Albumin                        | Goat   | 1:1000   | Bethyl Laboratories | A90-134A    |
| Anti-rabbit IgG                | Goat   | 1:3000   | Vector Laboratories | PI-1000     |
| Anti-mouse IgG                 | Horse  | 1:3000   | Vector Laboratories | PI-2000     |
| Anti-goat IgG                  | Donkey | 1:3000   | Vector Laboratories | PI-9500     |
| Alexa-700 anti-CD11b           | Rat    | 1:100    | Biolegend           | 101222      |
| APC anti-F4/80                 | Rat    | 1:100    | Biolegend           | 123116      |
| PE anti-CD45                   | Mouse  | 1:100    | Biolegend           | 157604      |
| APC-eFluor780 anti-IL1 $\beta$ | Rat    | 1:100    | eBioscience         | 47-7114-82  |
| FITC anti-CD206                | Rat    | 1:100    | Biolegend           | 141704      |
| Fc block                       | Rat    | 1:50     | BD Biosciences      | 553141      |

65
